# Supplementary material
Source: publisher site journal article supplement (https://spandidos-publications.com/3148/downloadSupplementary)
Supplement: Supplementary file 1 [file downloadSupplementary]

Figure S1. H&E images of healthy kidney and clear cell renal cell carcinoma tissues (magnification, x200).

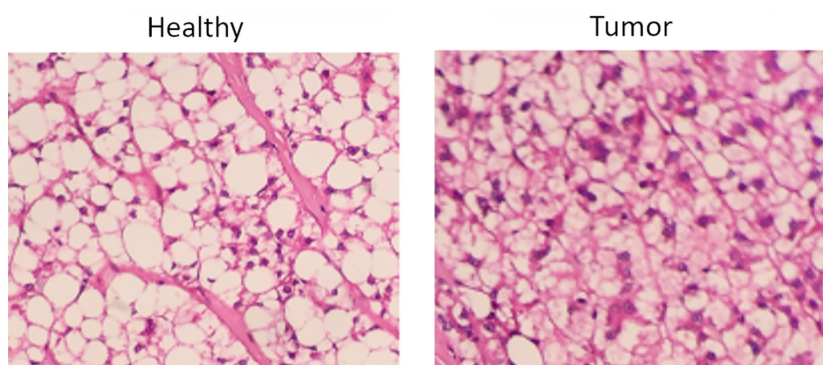

Figure S2. Transfection efficiency of miR-375 mimics and inhibitor and YAP1 overexpressing vector. The expression of miR-375 was determined in Caki-1 and A498 cells transfected with (A) miR-NC mimics or miR-375 mimics and (B) miR-NC or miR-375 inhibitor. Caki-1 and A498 cells were transfected with empty vector or YAP1 overexpressing vector, and (C) the mRNA and (D) protein levels of YAP1 were detected by reverse transcription-quantitative PCR or western blotting, respectively. \*\*P<0.01. NC, negative control; miR, microRNA; YAP1, yes-associated protein 1.

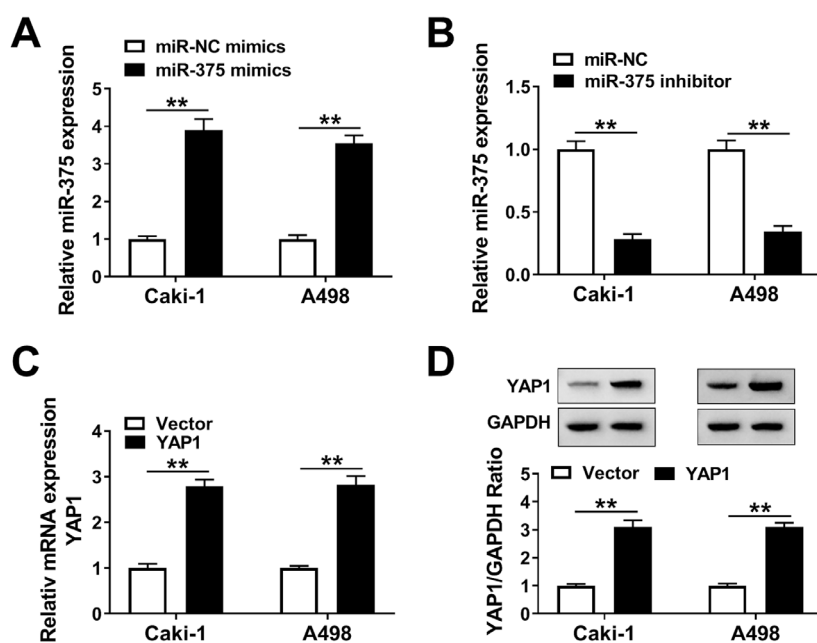

Figure S3. LUCAT1 overexpression promotes the proliferation, migration and invasion of renal cell carcinoma cells. Caki-1 and A498 cells were transfected with vector or LUCAT1 overexpression vector. (A) The expression level of LUCAT1 was measured by reverse transcription-quantitative PCR. Cell proliferation was examined using the Cell Counting Kit-8 assay in transfected (B) Caki-1 and (C) A498 cells. (D) Cell migratory and (E) invasive capabilities were assessed by Transwell assay in transfected Caki-1 and A498 cells. \*\* $P < 0.01$ . LUCAT1, lung cancer-associated transcript 1; OD, optical density.

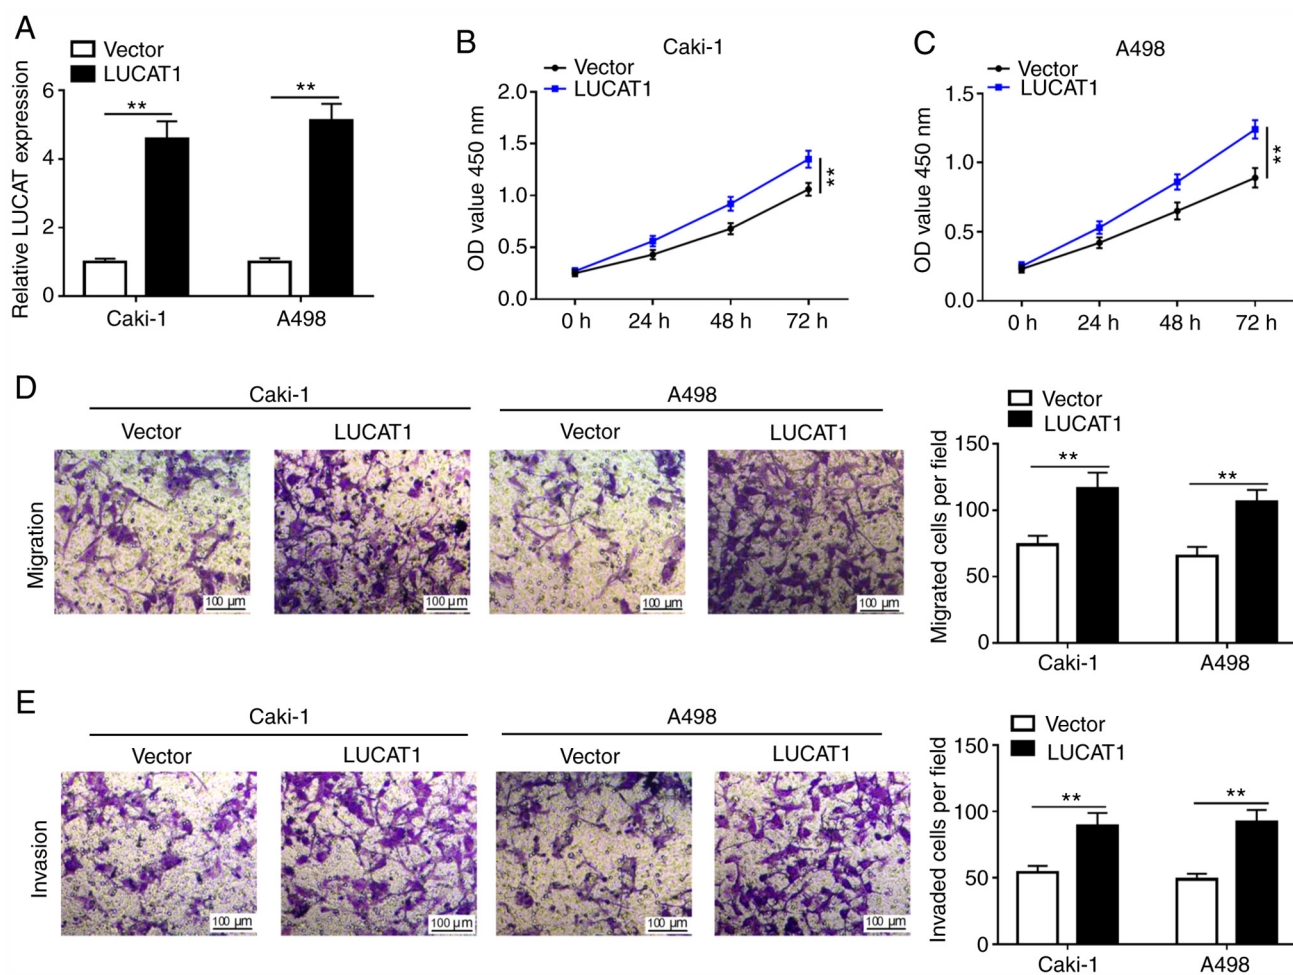

Table SI. Association of clinicopathological features with YAP1 expression in patients with clear cell renal cell carcinoma.

| Parameter             | Number of cases | YAP1 expression |             | P-value <sup>a</sup> |
|-----------------------|-----------------|-----------------|-------------|----------------------|
|                       |                 | Low (n=29)      | High (n=33) |                      |
| Sex                   |                 |                 |             |                      |
| Female                | 30              | 15              | 15          | 0.622                |
| Male                  | 32              | 14              | 18          |                      |
| Age, years            |                 |                 |             |                      |
| ≤55                   | 27              | 14              | 13          | 0.482                |
| >55                   | 35              | 15              | 20          |                      |
| Tumor stage           |                 |                 |             |                      |
| T1-2                  | 40              | 24              | 16          | 0.007 <sup>b</sup>   |
| T3-4                  | 22              | 5               | 17          |                      |
| Tumor size, cm        |                 |                 |             |                      |
| ≤4                    | 28              | 18              | 10          | 0.012 <sup>b</sup>   |
| >4                    | 34              | 11              | 23          |                      |
| Lymph node metastasis |                 |                 |             |                      |
| No                    | 36              | 25              | 11          | <0.001 <sup>b</sup>  |
| Yes                   | 26              | 4               | 22          |                      |
| Distant metastasis    |                 |                 |             |                      |
| No                    | 39              | 21              | 18          | 0.146                |
| Yes                   | 23              | 8               | 15          |                      |

<sup>a</sup>Fisher's exact test or Pearson's  $\chi^2$  test was used as appropriate. <sup>b</sup>P<0.05 was considered to indicate a statistically significant difference. T, tumor; YAP1, yes-associated protein 1.

Table SII. Association of clinicopathological features with miR-375 expression in patients with clear cell renal cell carcinoma.

| Parameter             | Number of cases | miR-375 expression |             | P-value <sup>a</sup> |
|-----------------------|-----------------|--------------------|-------------|----------------------|
|                       |                 | Low (n=31)         | High (n=31) |                      |
| Sex                   |                 |                    |             |                      |
| Female                | 30              | 13                 | 17          | 0.309                |
| Male                  | 32              | 18                 | 14          |                      |
| Age, years            |                 |                    |             |                      |
| ≤55                   | 27              | 13                 | 14          | 0.798                |
| >55                   | 35              | 18                 | 17          |                      |
| Tumor stage           |                 |                    |             |                      |
| T1-2                  | 40              | 14                 | 26          | 0.003 <sup>b</sup>   |
| T3-4                  | 22              | 17                 | 5           |                      |
| Tumor size, cm        |                 |                    |             |                      |
| ≤4                    | 28              | 9                  | 19          | 0.011 <sup>b</sup>   |
| >4                    | 34              | 22                 | 12          |                      |
| Lymph node metastasis |                 |                    |             |                      |
| No                    | 36              | 14                 | 22          | 0.040 <sup>b</sup>   |
| Yes                   | 26              | 17                 | 9           |                      |
| Distant metastasis    |                 |                    |             |                      |
| No                    | 39              | 24                 | 15          | 0.018 <sup>b</sup>   |
| Yes                   | 23              | 7                  | 16          |                      |

<sup>a</sup>Fisher's exact test or Pearson's  $\chi^2$  test was used as appropriate. <sup>b</sup>P<0.05 was considered to indicate a statistically significant difference. T, tumor; miR, microRNA.
